# Supplementary material for: Midbrain ghrelin receptor signalling regulates binge drinking in a sex specific manner
Source: Springer Nature journal article supplement (doi:10.1038/s41467-025-57880-w), 2025-03-15
Supplement: MOESM1 [file 41467_2025_57880_MOESM1_ESM.pdf]

# SUPPLEMENTAL FIGURES – Pearl & Maddern et al.

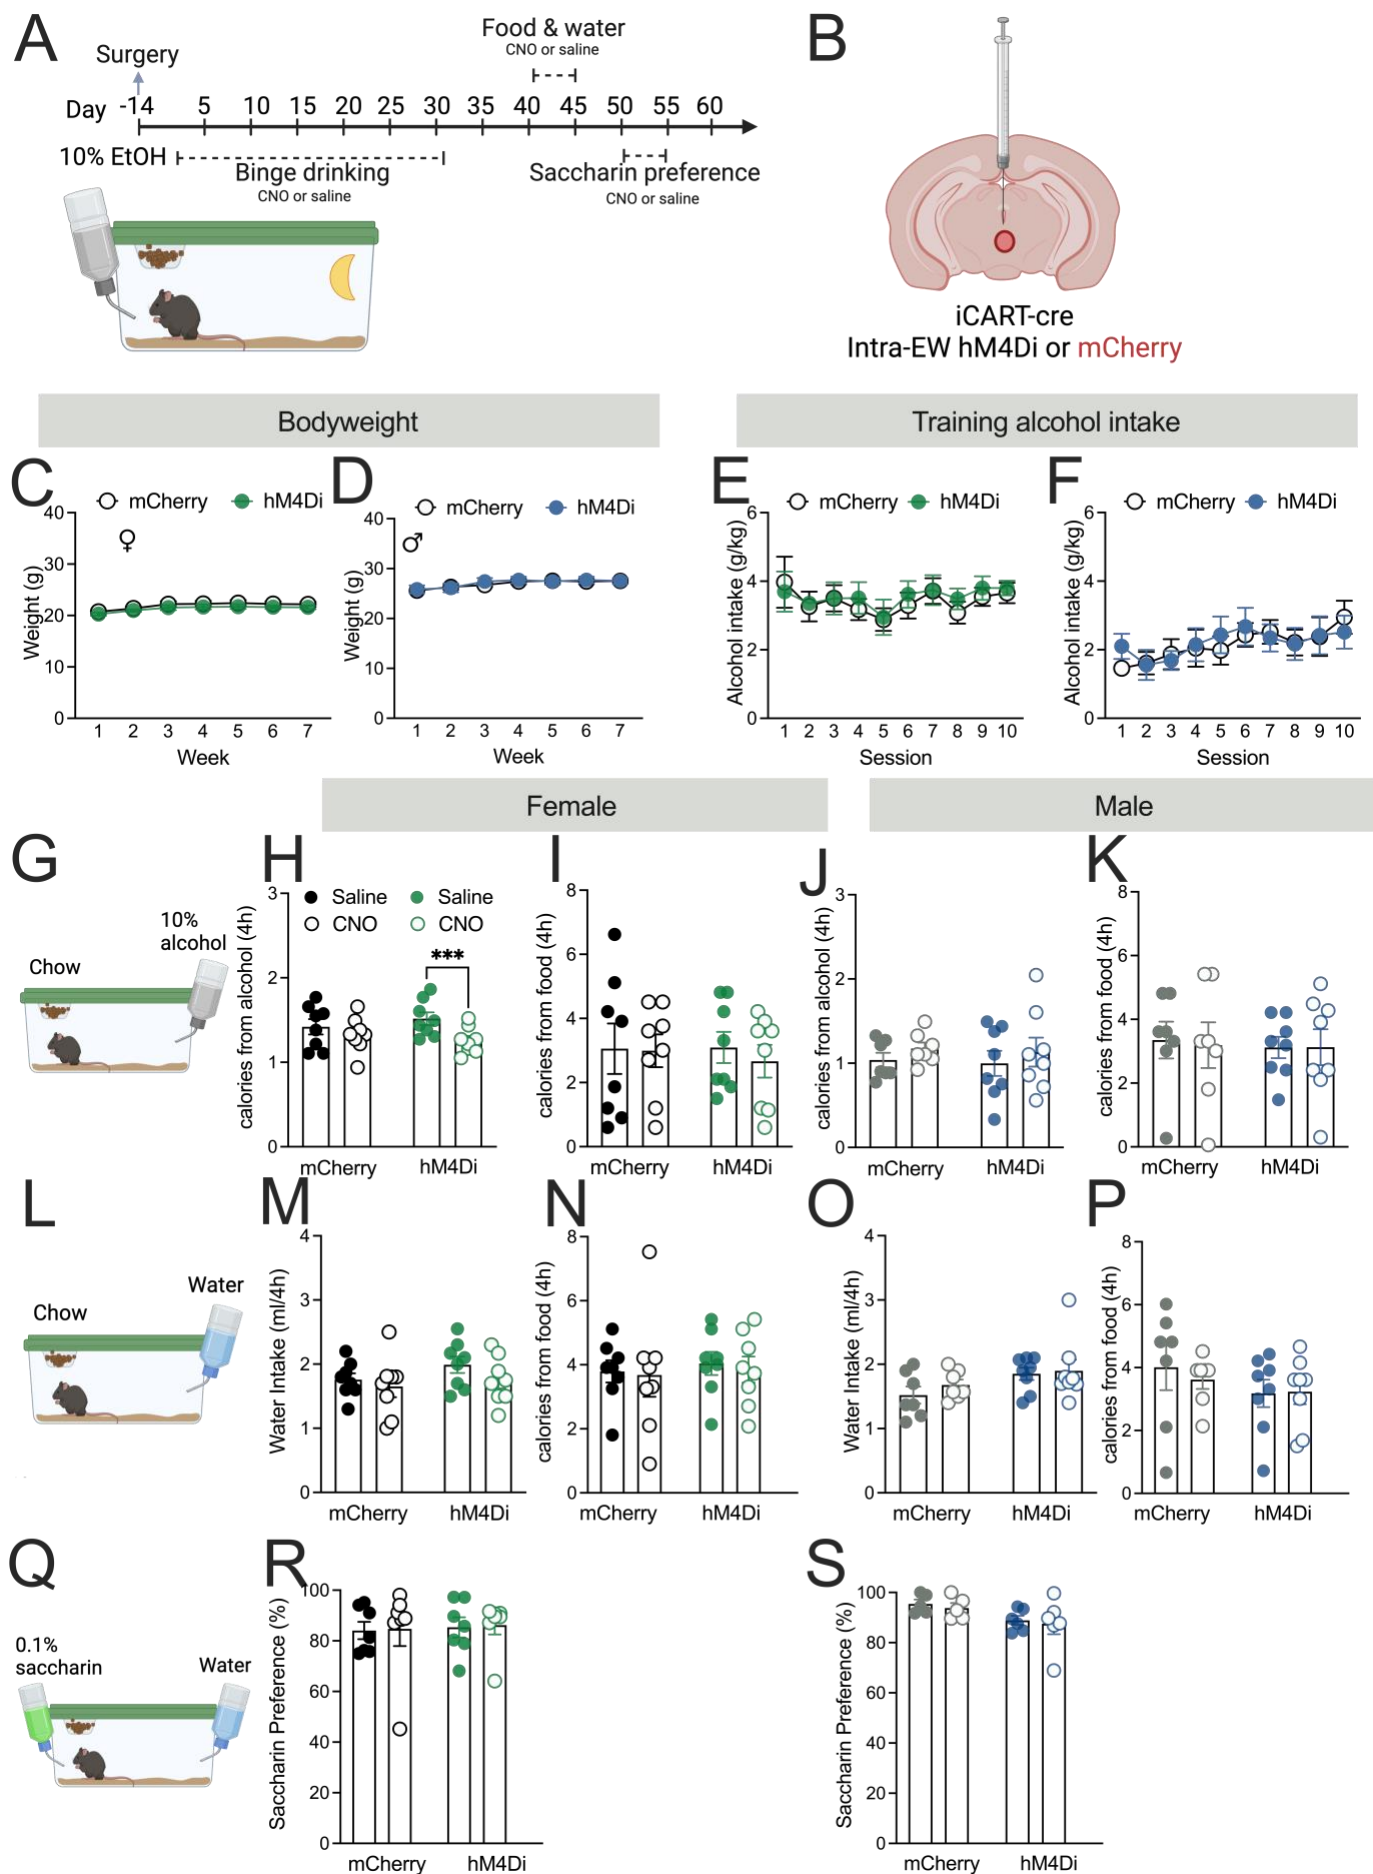

**Supplementary Figure 1, related to Figure 1: Chemogenetic inhibition of EW<sup>CART</sup> cells does not alter weight, water, food or saccharin intake.** (A) Schematic of experimental outline and (B) viral strategy. RM two-way ANOVA showed no difference in weight of (C) female (virus F (1, 15) = 0.8869,  $p=0.3612$ ; or interaction F (6, 90) = 0.2192,  $p=0.9697$ ; but a main effect of time F (6, 90) = 24.09,  $p<0.0001$ ;  $n=8/\text{group}$ ), or (D) male mice (virus F (1, 13) = 0.04279,  $p=0.8393$ ; or Interaction F (6, 78) = 1.094,  $p=0.3736$ ; but a main effect of time (F (6, 78) = 26.51,  $p<0.0001$ ;  $n=7$  mCherry, 8 hM4Di) between hM4Di and control virus treated mice. Further during training no difference in alcohol consumption was observed in (E) female (RM two-way ANOVA, virus F (1, 15) = 0.1544,  $p=0.6999$ ; interaction F (9, 135) = 0.1727,  $p=0.9965$ ; or time F (9, 135) = 1.303,  $p=0.2407$ ;  $n=8/\text{group}$ ) or (F) male mice (RM two-way ANOVA, virus F (1, 13) = 0.01091,  $p=0.9184$ ; or F (9, 117) = 1.211,  $p=0.2947$ ; but a main effect of time F (9, 117) = 6.673,  $p<0.0001$ ;  $n=7$  mCherry, 8 hM4Di). (G) Schematic of binge drinking. (H) Female mice showed a specific reduction in Kcal intake from alcohol (RM two-way ANOVA, no effect virus F (1, 14) = 0.01532,  $p=0.9033$ ; main effect CNO F (1, 14) = 26.96,  $p=0.0001$ ; and interaction F (1, 14) = 6.018,  $p=0.0279$ ;  $n=8/\text{group}$ ). Bonferroni post-hoc between saline and CNO treated mice showed this was specific to hM4Di mice ( $p=0.0002$ ), not mCherry ( $p=0.1464$ ). (I) Further no differences in food intake with alcohol (RM two-way ANOVA, no effect virus F (1, 14) = 0.03906,  $p=0.8462$ ; CNO F (1, 14) = 0.4057,  $p=0.5345$ ; or interaction F (1, 14) = 0.2224,  $p=0.6445$ ;  $n=8/\text{group}$ ) were observed in female mice. (J) No difference in Kcal intake from alcohol in male mice (RM two-way ANOVA, no effect virus, F (1, 13) = 0.06261,  $p=0.8063$ ; CNO F (1, 13) = 2.530,  $p=0.1357$ ; or interaction F (1, 13) = 0.0005652,  $p=0.9814$ ;  $n=7$  mCherry, 8 hM4Di), or (K) food intake with alcohol (RM two-way ANOVA, virus F (1, 13) = 0.04826,  $p=0.8295$ ; CNO F (1, 13) = 0.03520,  $p=0.8541$ ; or interaction F (1, 13) = 0.04677,  $p=0.8321$ ;  $n=7$  mCherry, 8 hM4Di). (L) Schematic of food and water intake. No difference in (M) water intake (RM two-way ANOVA, virus F (1, 14) = 1.213,  $p=0.2892$ ; CNO F (1, 14) = 2.395,  $p=0.1440$ ; or interaction F (1, 14) = 0.3441,  $p=0.5668$ ;  $n=8/\text{group}$ ) or (N) Kcal food intake (RM two-way ANOVA, virus F (1, 14) = 0.1538,  $p=0.7008$ ; CNO F (1, 14) = 0.1489,  $p=0.7054$ ; or interaction F (1, 14) = 0.01001,  $p=0.9217$ ;  $n=8/\text{group}$ ) was observed in female mice. (O) A trend towards main effect of virus was observed in male mice on water intake (RM two-way ANOVA, virus F (1, 13) = 3.440,  $p=0.0865$ ; no effect CNO F (1, 13) = 0.9864,  $p=0.3387$ ; or interaction F (1, 13) = 0.2832,  $p=0.6036$ ), but no difference between CNO and saline with Bonferroni *post hoc*, mCherry,  $p=0.6307$ ; hM4Di,  $p>0.9999$ ;  $n=7$  mCherry, 8 hM4Di), and no effect on (P) Kcal food intake with water (RM two-way ANOVA, virus F (1, 13) = 1.017,  $p=0.3317$ ; CNO F (1, 13) = 0.2711,  $p=0.6114$ ; or interaction F (1, 13) = 0.4660,  $p=0.5068$ ;  $n=7$  mCherry, 8 hM4Di) was observed in male mice. (Q) Schematic of saccharin preference. No difference in 0.1% saccharin preference was observed in (R) female (RM two-way ANOVA, virus F (1, 12) = 0.06909,  $p=0.7971$ ; CNO F (1, 12) = 0.03693,  $p=0.8508$ ; or interaction F (1, 12) = 0.001049,  $p=0.9747$ ;  $n=7/\text{group}$ ) mice. (S) Male mice with hM4Di DREADD showed greater intake than mCherry mice (main effect virus F (1, 9) = 5.219,  $p=0.0482$ ), however, there was no effect of CNO (F (1, 9) = 0.3088,  $p=0.5920$ ; or interaction F (1, 9) = 0.003404,  $p=0.9548$ ;  $n=5$  mCherry, 6 hM4Di). Bonferroni *post hoc* showed no difference between saline and CNO for mCherry ( $p>0.9999$ ) or hM4Di ( $p>0.9999$ ). Data expressed as mean  $\pm$  SEM. Source data are provided as a source data file. Created in BioRender. Walker, L. (2025) <https://BioRender.com/l12b283> & <https://BioRender.com/a19p668> [Agreement #RQ27UEVW56 & NH27UEW4CZ].

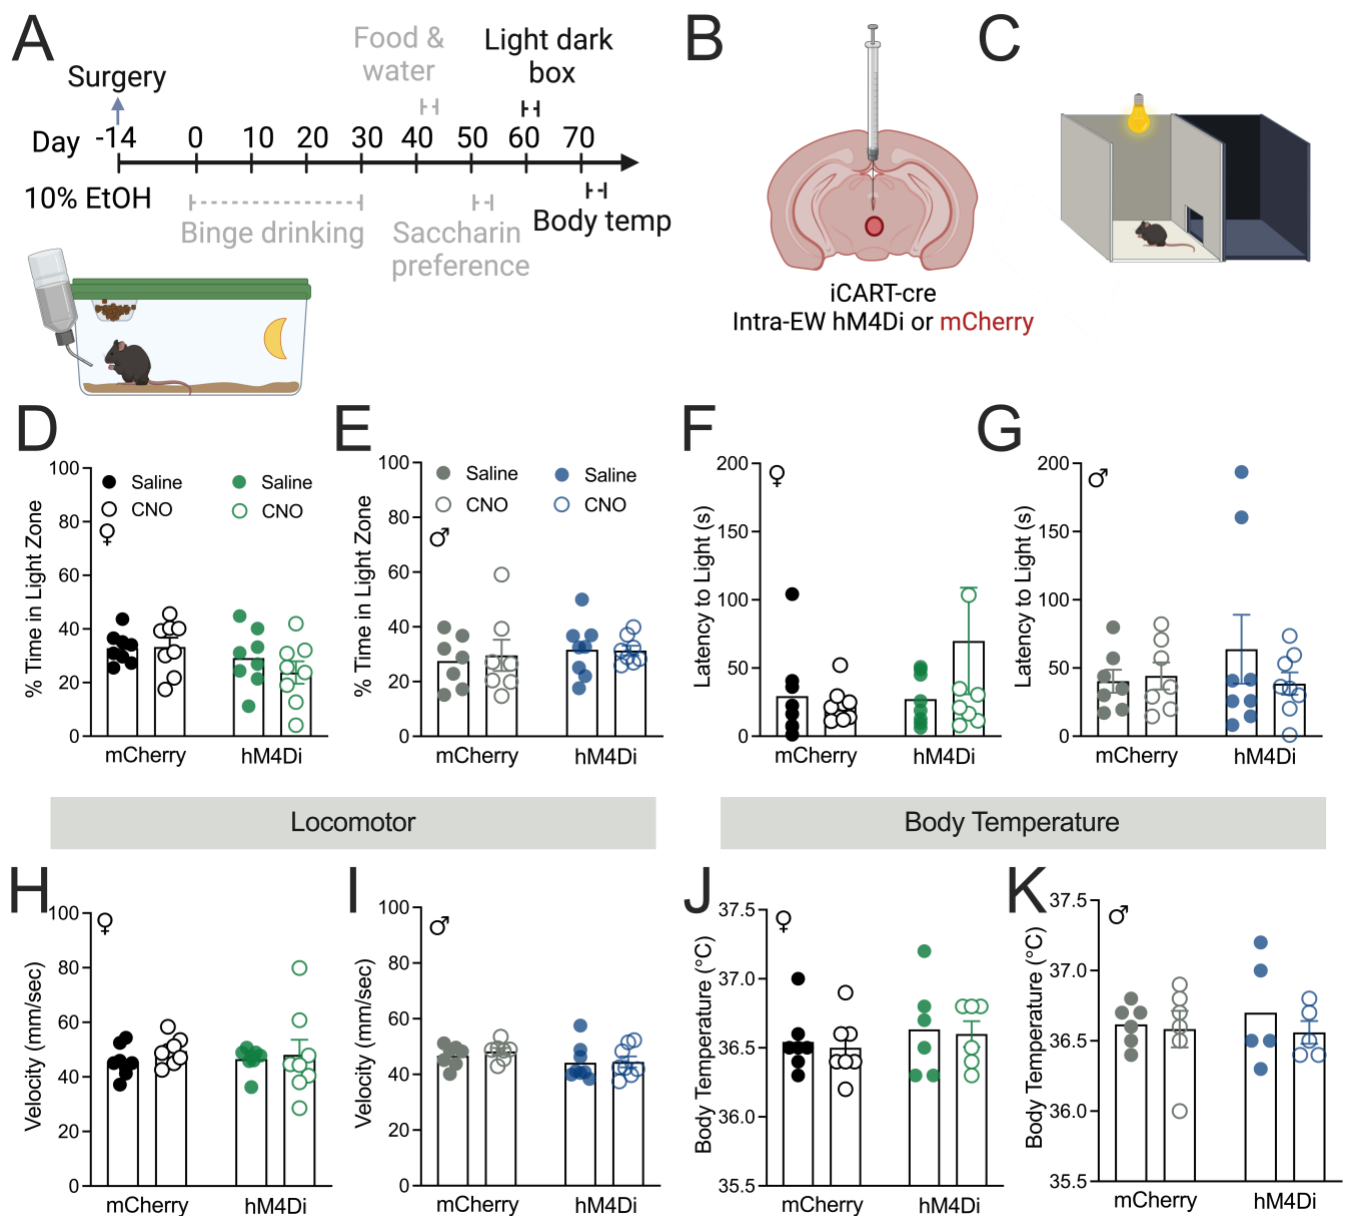

**Supplementary Figure 2, related to Figure 1: Chemogenetic inhibition of EW<sup>CART</sup> cells does not alter anxiety-like behaviour or body temperature.** (A) Experimental timeline, (B) viral strategy and (C) schematic of light-dark box. Two-way repeated measures ANOVA showed chemogenetic inhibition of EW<sup>CART</sup> cells did not alter % time spent in the light zone of (D) female (virus F (1, 15) = 2.394,  $p=0.1426$ ; CNO F (1, 15) = 0.4651,  $p=0.5056$ ; or interaction F (1, 15) = 0.6733,  $p=0.4248$ ;  $n=8$ /group) or (E) male control or DREADD treated mice (virus F (1, 13) = 0.3790,  $p=0.5488$ ; CNO F (1, 13) = 0.1344,  $p=0.7198$ ; or interaction F (1, 13) = 0.2504,  $p=0.6252$ ;  $n=7$ mCherry, 8 hM4Di); latency to light in (F) female (virus F (1, 15) = 0.9889,  $p=0.3358$ ; CNO F (1, 15) = 0.4883,  $p=0.4954$ ; or interaction F (1, 15) = 1.025,  $p=0.3273$ ;  $n=8$ /group) or (G) male control or DREADD treated mice (virus F (1, 13) = 0.3208,  $p=0.5807$ ; CNO F (1, 13) = 0.4987,  $p=0.4926$ ; or interaction F (1, 13) = 0.9266,  $p=0.3533$ ;  $n=7$ mCherry, 8 hM4Di). Further RM two-way ANOVA showed no effect of CNO on velocity in (H) female (virus F (1, 15) = 0.08511,  $p=0.7745$ ; CNO F (1, 15) = 0.4294,  $p=0.5222$ ; or interaction F (1, 15) = 0.3438,  $p=0.5664$ ;  $n=8$ /group) or (I) but a trend towards main effect of virus was observed in male mice (virus F (1, 13) = 3.320,  $p=0.0915$ ; CNO F (1, 13) = 0.2324,  $p=0.6378$ ; or interaction F (1, 13) = 0.09966,  $p=0.7572$ ). Bonferroni *post hoc* showed no difference between saline and CNO treatment for mCherry ( $p=0.8353$ ) or hM4Di ( $p=0.9910$ ) mice ( $n=7$ mCherry, 8 hM4Di). No effect on body temperature in (J) female (RM two-way ANOVA, virus F (1, 11) = 0.5349,  $p=0.4798$ ; CNO F (1, 11) = 0.4206,  $p=0.5299$ ; or interaction F (1, 11) = 0.006572,  $p=0.9368$ ;  $n=7$  mCherry, 6 hM4Di) or (K) male control or DREADD treated mice (RM two-way ANOVA, virus F (1, 9) = 0.03924,  $p=0.8474$ ; CNO F (1, 9) = 1.819,  $p=0.2103$ ; or interaction F (1, 9) = 0.6890,  $p=0.4280$ ;  $n=6$  mCherry, 5 hM4Di). Data expressed as mean  $\pm$  SEM,  $n = 6-9$ /group. Source data are provided as a source data file. Created in BioRender. Walker, L. (2025) <https://BioRender.com/p75g008> & <https://BioRender.com/v56y748> [Agreement #ZX27UEWEJG & VO27UEWR8I].

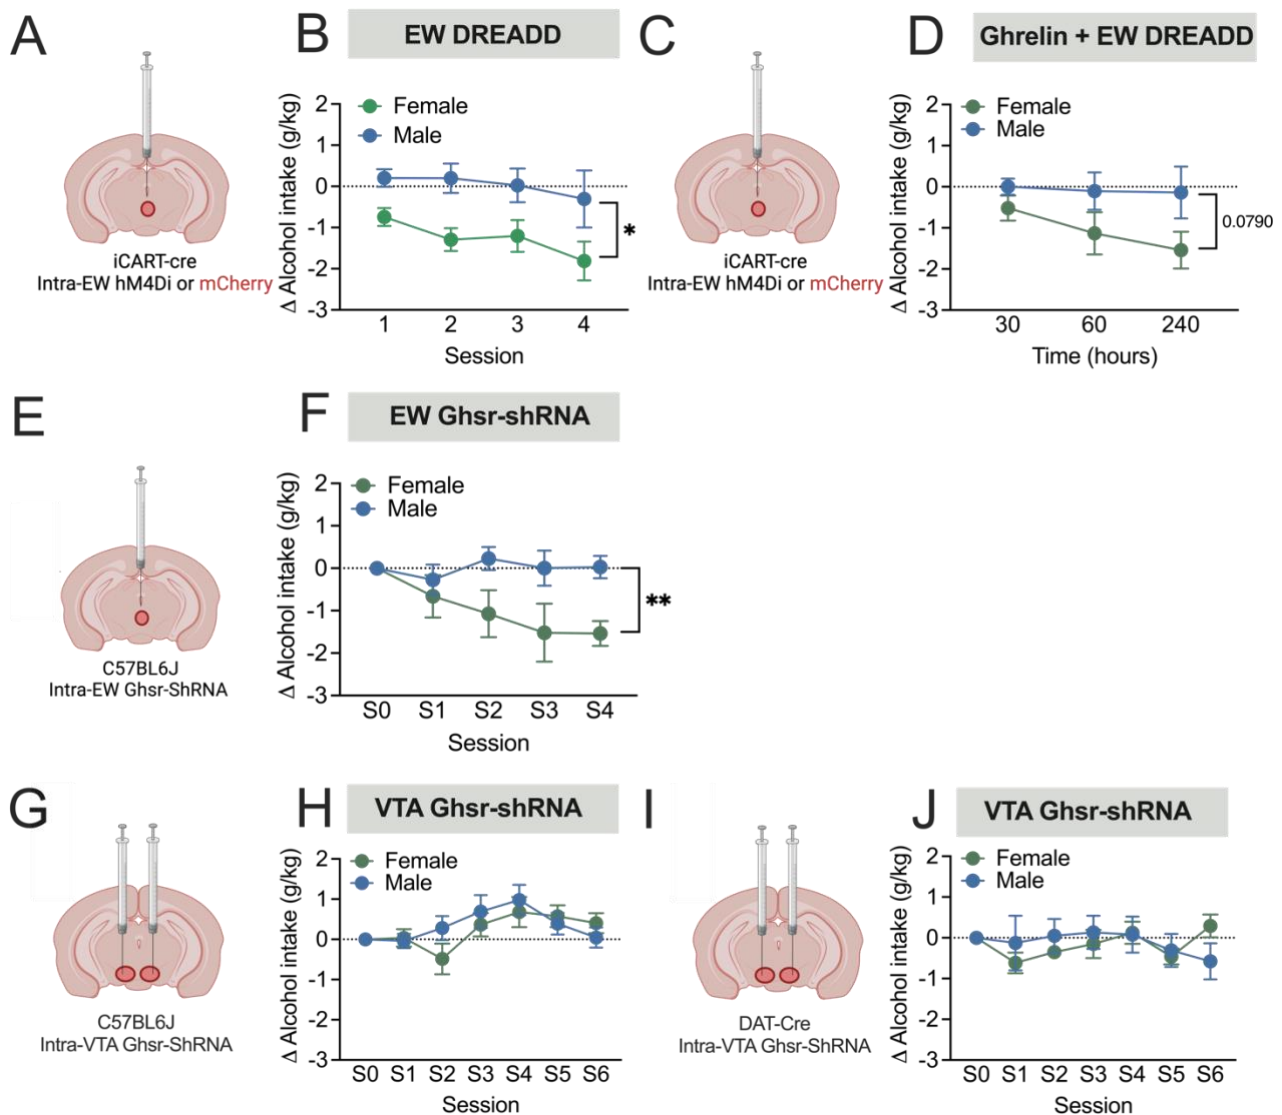

**Supplementary Figure 3, related to Figure 1, 2 and Supp 3: EW inhibition specifically reduces alcohol consumption in female mice. (A)** Schematic of viral strategy. **(B)** Female C57BL6J mice with hM4Di in the EW showed a specific reduction in  $\Delta$  alcohol intake when treated with CNO compared to male mice (RM two way ANOVA, sex  $F(1, 15) = 7.874, p = 0.0133$ ; time  $F(3, 45) = 2.977, p = 0.0414$ ; no interaction  $F(3, 45) = 0.4816, p = 0.6967$ ; Bonferroni post hoc female vs. male S1  $p = 0.3966$ , S2  $p = 0.0429$ , S3  $p = 0.1357$ , S4  $p = 0.0399$ ,  $n = 9F, 8M$ ). **(C)** Schematic of viral strategy. **(D)** Female C57BL6J mice with hM4Di in the EW showed a specific reduction in  $\Delta$  ghrelin-induced alcohol intake when treated with CNO compared to male mice (RM two-way ANOVA, trend towards main effect, sex  $F(1, 14) = 3.590, p = 0.0790$ ; no effect of session  $F(1.477, 20.68) = 1.766, p = 0.1997$ ; or interaction  $F(2, 28) = 1.003, p = 0.3797$ ;  $n = 8/\text{sex}$ ). **(E)** Schematic of viral strategy. **(F)** Female mice with GhSr-ShRNA injected in the EW showed a specific reduction in  $\Delta$  alcohol intake compared to male mice (RM two-way ANOVA, main effect of sex  $F(1, 12) = 9.582, p = 0.0093$ ; no effect of session  $F(2.786, 33.43) = 1.446, p = 0.2479$ ; or interaction  $F(4, 48) = 1.908, p = 0.1244$ ; Bonferroni post hoc female vs. male S1  $p = 0.9788$ , S2  $p = 0.2859$ , S3  $p = 0.3607$ , S4  $p = 0.0092$ ;  $n = 7/\text{sex}$ ). **(G)** Schematic of viral strategy. **(H)** No difference in  $\Delta$  alcohol intake was observed between sexes when GhSr-ShRNA was injected in the VTA of C57BL6J mice (RM two-way ANOVA, no effect sex  $F(1, 16) = 0.1393, p = 0.7139$ ; interaction  $F(6, 96) = 1.396, p = 0.2242$ ; main effect of session  $F(6, 96) = 4.569, p = 0.0004$ ;  $n = 11F, 7M$ ). **(I)** Schematic of viral strategy. **(J)** No difference in  $\Delta$  alcohol intake was observed between sexes when GhSr-ShRNA was injected in the VTA of DAT-Cre mice (RM two-way ANOVA, no main effect sex,  $F(1, 9) = 0.04053, p = 0.8449$ ; session  $F(3.188, 28.69) = 0.8519, p = 0.4829$ , or  $F(6, 54) = 1.260, p = 0.2914$ ;  $n = 6F, 7M$ ). Data expressed as mean  $\pm$  SEM. Source data are provided as a source data file. Created in BioRender. Walker, L. (2025) <https://BioRender.com/e95n462> [Agreement #RW27UEX5ES].



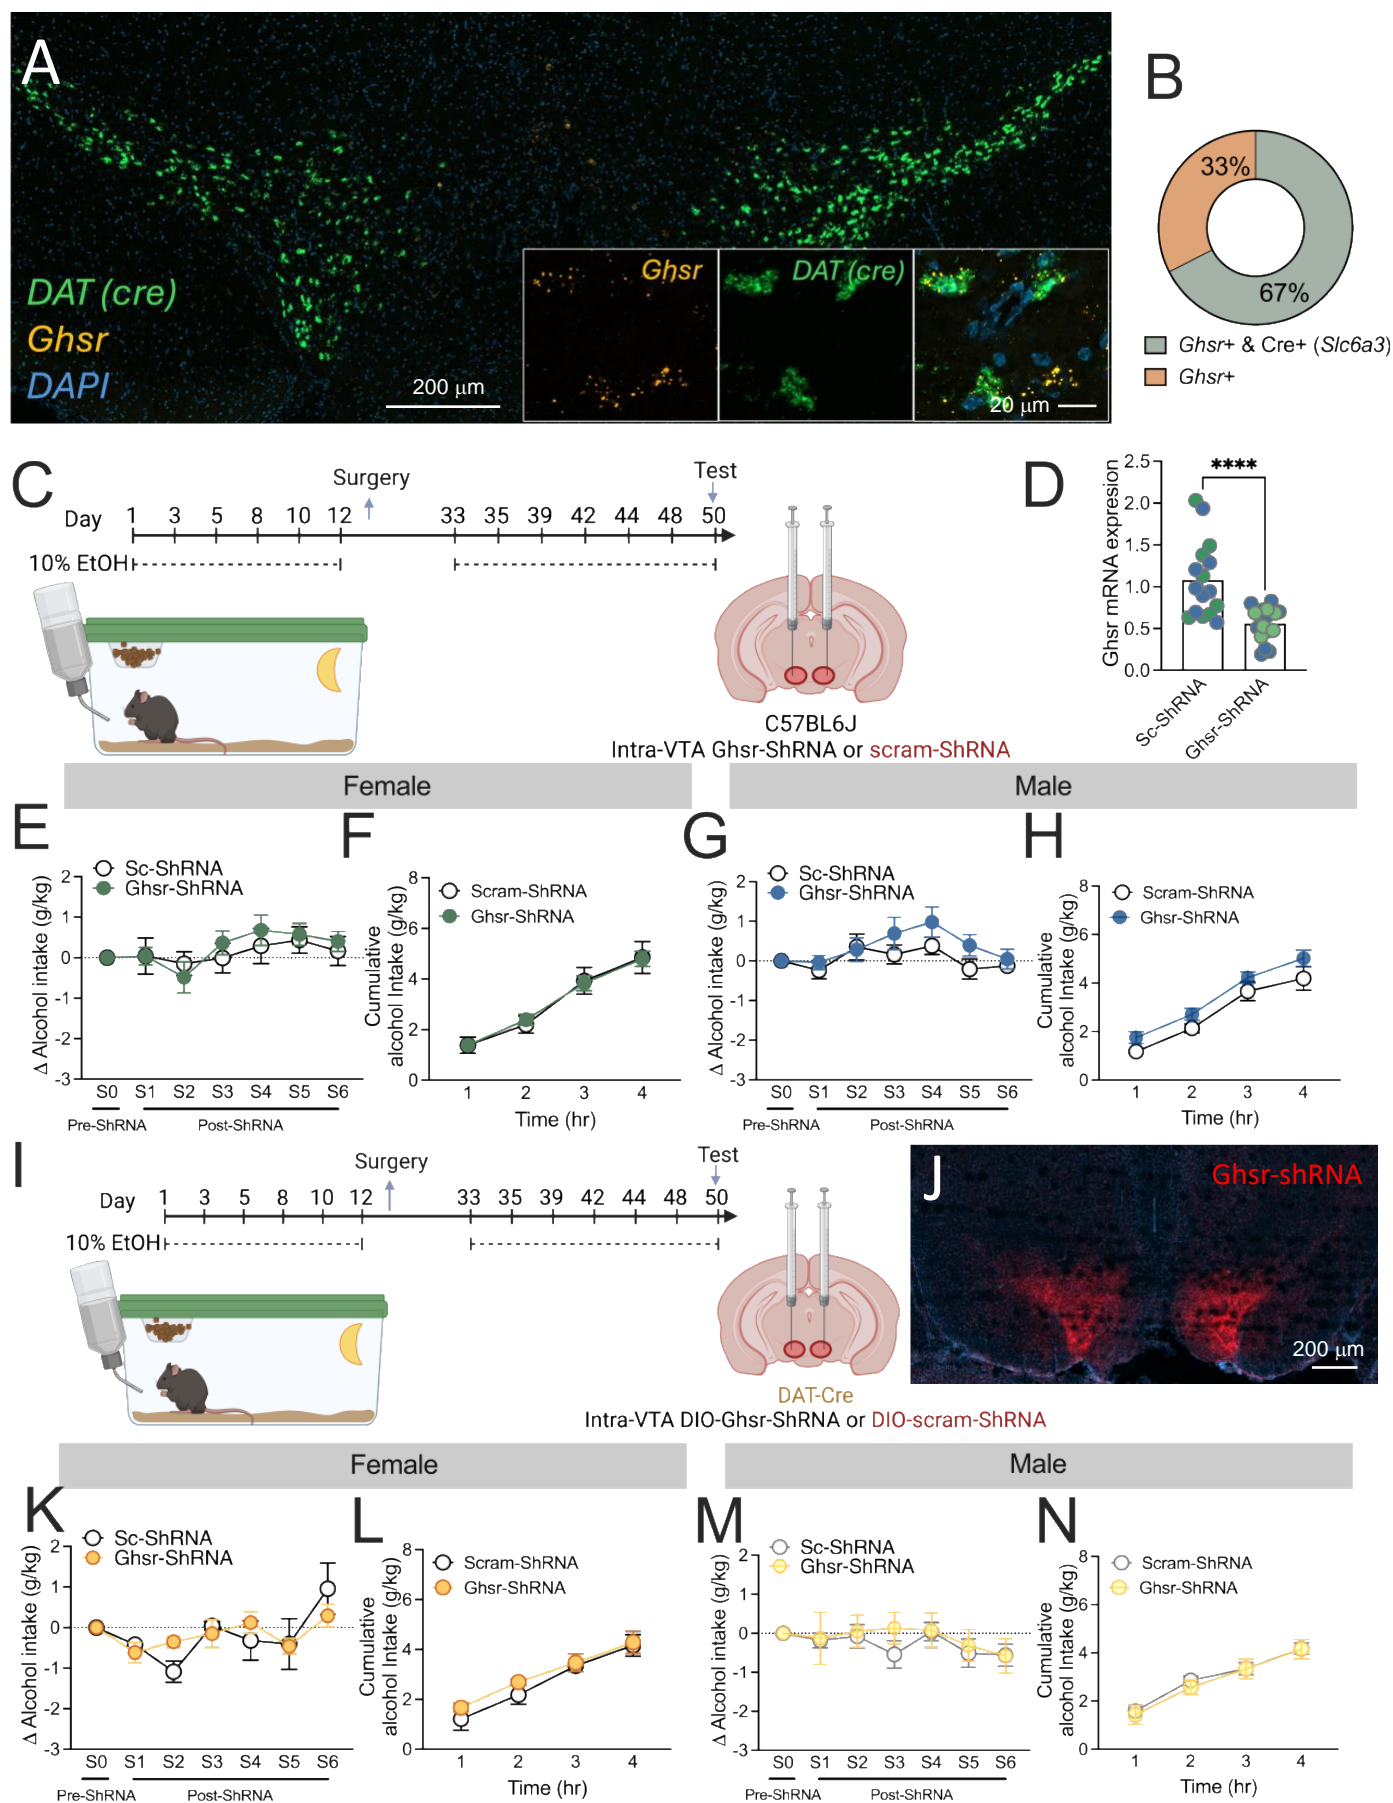

**Supplementary Figure 4, VTA GHSR knockdown does not alter binge drinking in male or female mice.** (A) Representative image of *Ghnr* expression with *DAT (cre)* in the VTA. (B) *Ghnr* mRNA was expressed in 67% *Cre*+ (*DAT*) cells in the VTA, but also on 33% *DAT*-negative cells. (C) Schematic of viral

strategy. **(D)** Ghnr-ShRNA reduced *Ghnr* mRNA expression in the VTA (unpaired t-test,  $t=4.450$ ,  $df=32$ ,  $p<0.0001$ ;  $n=15$  sc-ShRNA [7F, 8M pooled], 18 *Ghnr*-ShRNA [11F, 7M pooled]). **(E)** No significant difference was observed in female mice post shRNA knockdown during training (Two-way ANOVA, no effect of treatment  $F(1, 17) = 0.1594$ ,  $p=0.6947$ ; interaction  $F(11, 187) = 0.4879$ ,  $p=0.9093$ ; main effect of session  $F(4.962, 84.35) = 2.883$ ,  $p=0.0191$ ; Bonferroni *post hoc* showed no difference to S0 in Sc-ShRNA or *Ghnr*-ShRNA,  $p's>0.1$ ) or **(F)** cumulative intake during test (Two-way ANOVA, no effect of treatment  $F(1, 17) = 0.0008908$ ,  $p=0.9765$ ; interaction  $F(3, 51) = 0.2372$ ,  $p=0.8700$ ; main effect of time  $F(3, 51) = 140.3$ ,  $p<0.0001$ ). **(G)** No significant difference was observed in male mice post shRNA knockdown during training (Two-way ANOVA, no effect of treatment  $F(1, 14) = 2.262$ ,  $p=0.1548$ ; interaction  $F(11, 154) = 1.335$ ,  $p=0.2102$ ; main effect of session  $F(4.523, 63.32) = 7.010$ ,  $p<0.0001$ ; Bonferroni *post hoc* compared to S0, Sc-ShRNA S0 vs. S3  $p=0.0039$ , S0 vs. S10  $p=0.0640$ ; *Ghnr*-ShRNA S0 vs S6  $p=0.0092$ , S0 vs. S10  $p=0.0669$ ) but a trend in **(H)** cumulative intake during test (Two-way ANOVA, treatment  $F(1, 13) = 3.150$ ,  $p=0.0993$ ; main effect of time  $F(3, 39) = 98.46$ ,  $p<0.0001$ ; no interaction  $F(3, 39) = 0.2024$ ,  $p=0.8941$ ). **(I)** Schematic of viral strategy. **(J)** Representative image of *Ghnr*-ShRNA in the VTA of DAT-Cre mice. **(K)** No significant difference was observed in female DAT-Cre mice post shRNA knockdown during training (Two-way ANOVA, treatment  $F(1, 9) = 0.001528$ ,  $p=0.9697$ ; or interaction  $F(6, 54) = 1.275$ ,  $p=0.2845$ ; main effect of session  $F(2.405, 21.65) = 4.730$ ,  $p=0.0153$ ; Bonferroni *post hoc* showed no difference to S0 in Sc-ShRNA or *Ghnr*-ShRNA,  $p's>0.1$ ) or **(L)** cumulative intake during test (Two-way ANOVA, treatment  $F(1, 17) = 0.0008908$ ,  $p=0.9765$ ; interaction  $F(3, 51) = 0.2372$ ,  $p=0.8700$ ; main effect time  $F(3, 51) = 140.3$ ,  $p<0.0001$ ). **(M)** No significant difference was observed in male DAT-Cre mice post shRNA knockdown during training (Two-way ANOVA, no effect treatment  $F(1, 10) = 0.1883$ ,  $p=0.6735$ ; session  $F(3.158, 31.58) = 1.615$ ,  $p=0.2038$ ; or interaction  $F(6, 60) = 0.4416$ ,  $p=0.8481$ ) or **(N)** cumulative intake during test (Two-way ANOVA, no effect of treatment  $F(1, 10) = 0.1027$ ,  $p=0.7552$ ; interaction  $F(3, 30) = 0.2577$ ,  $p=0.8552$ ; main effect time  $F(3, 30) = 73.20$ ,  $p<0.0001$ ). Data expressed as mean  $\pm$  SEM.  $n = 7$  female C57BL6J Sc-ShRNA, 12 female C57BL6J *Ghnr*-ShRNA, 9 male C57BL6J Sc-ShRNA, 7 female C57BL6J *Ghnr*-ShRNA;  $n = 5$  female DAT-Cre Sc-ShRNA, 6 female DAT-Cre *Ghnr*-ShRNA, 7 male DAT-Cre Sc-ShRNA, 5 male DAT-Cre *Ghnr*-ShRNA. Source data are provided as a source data file. Created in BioRender. Walker, L. (2025) <https://BioRender.com/u91y968> & <https://BioRender.com/q38o338> [Agreement # FF27UEXDWN & GX27UEXK25].

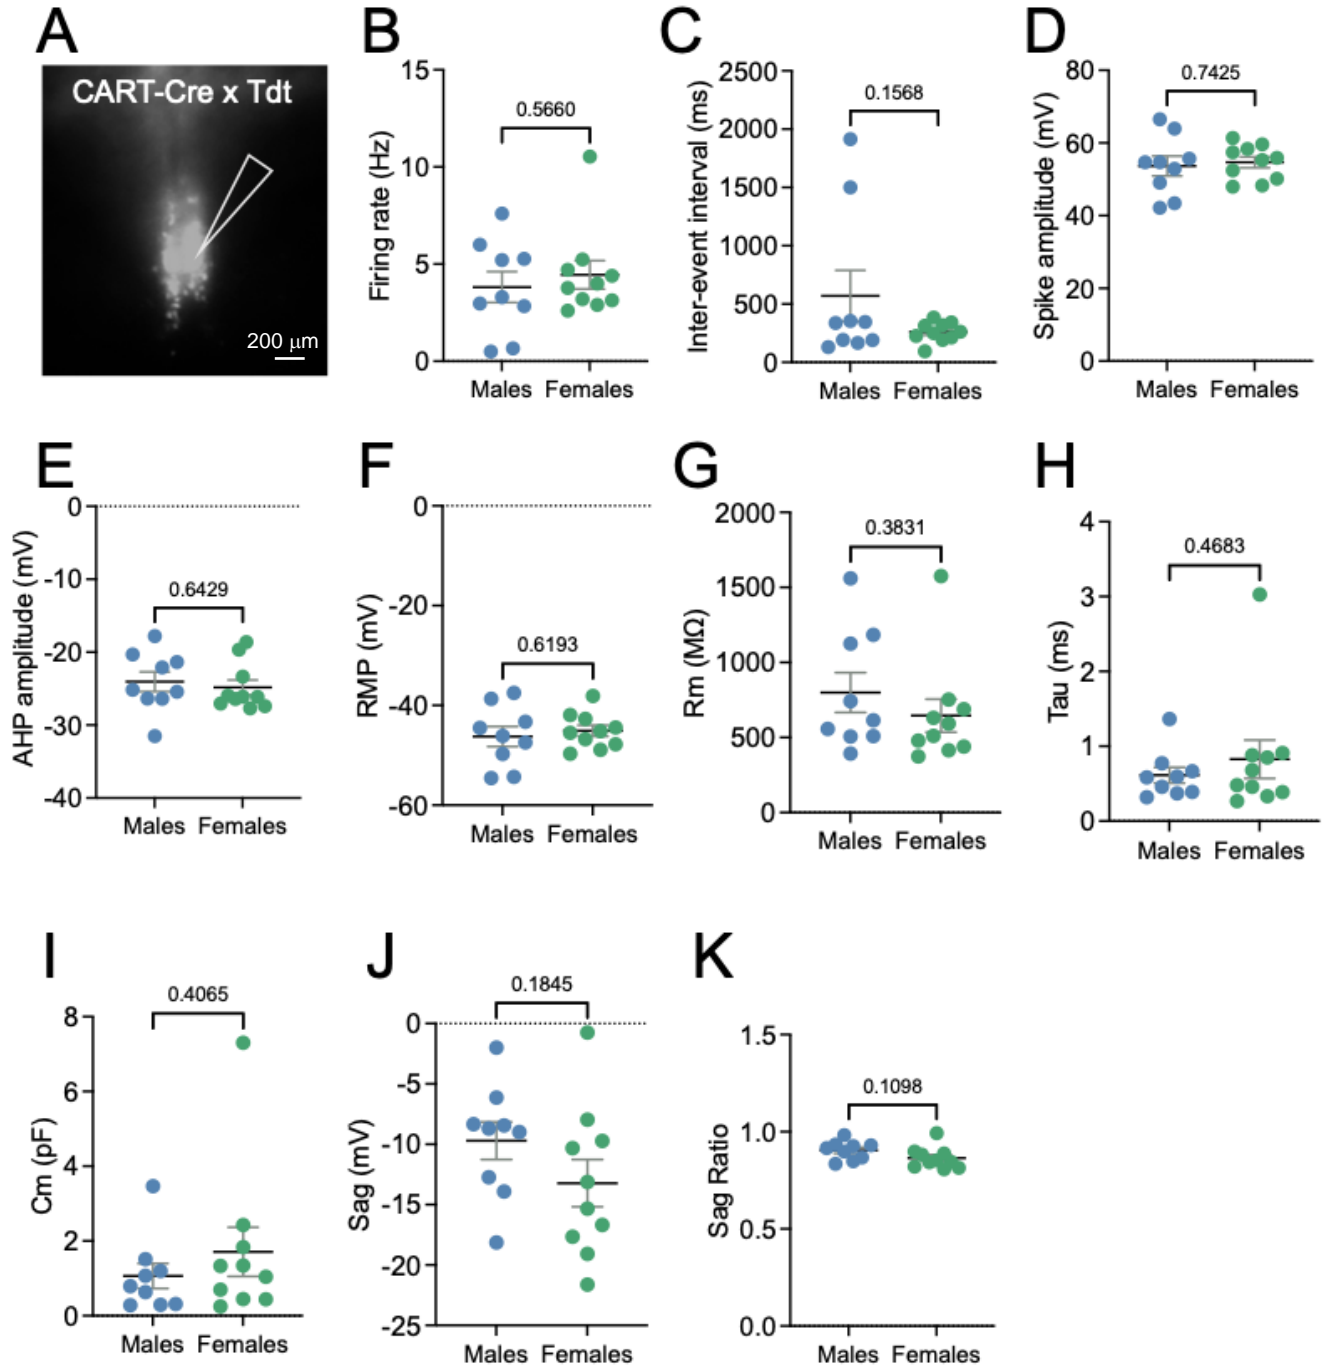

**Supplementary Figure 5, related to Figure 4: No sex difference in basal electrophysiological properties of EW<sup>CART</sup> cells.** (A) overview of Tdtomato expression in the EW where patch clamp recording were collected. Unpaired t-test showed no sex differences were in (B) Firing rate ( $t=0.5854$ ,  $df=17$ ,  $p=0.5660$ ), (C) inter-event interval ( $t=1.482$ ,  $df=17$ ,  $p=0.1568$ ), (D) spike amplitude ( $t=0.3339$ ,  $df=17$ ,  $p=0.7425$ ), (E) AHP amplitude ( $t=0.4720$ ,  $df=17$ ,  $p=0.6429$ ), (F) resting membrane potential (RMP,  $t=0.5060$ ,  $df=17$ ,  $p=0.6193$ ), (G) membrane resistance (Rm,  $t=0.8953$ ,  $df=17$ ,  $p=0.3831$ ), (H) tau ( $t=0.7418$ ,  $df=17$ ,  $p=0.4683$ ), (I) membrane time constant (Cm,  $t=0.8511$ ,  $df=17$ ,  $p=0.4065$ ), (J) sag ( $t=1.383$ ,  $df=17$ ,  $p=0.1845$ ), or (K) sag ratio ( $t=1.687$ ,  $df=17$ ,  $p=0.1098$ ) when directly comparing male and female mice. Data expressed as mean  $\pm$  SEM.  $n = 10$  cells from 7 female mice, 9 cells from 7 male mice. Source data are provided as a source data file.

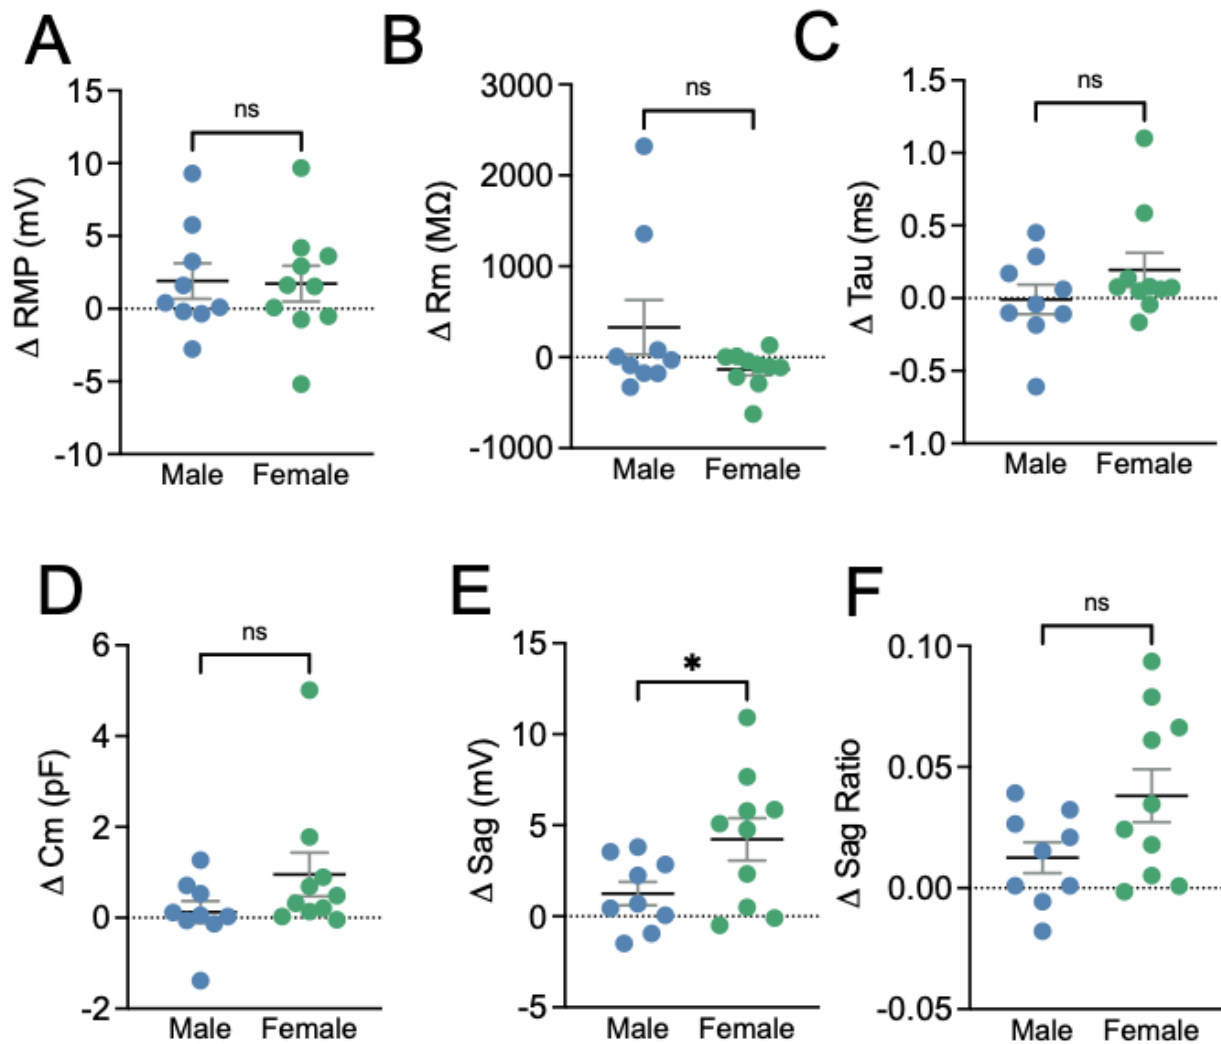

**Supplementary Figure 6, related to Figure 4: Sex differences in firing properties of EW<sup>CART</sup> cells following ghrelin application.** Unpaired t-test showed no sex differences in ghrelin induced changes in **(A)** resting membrane potential (RMP,  $t=0.1051$ ,  $df=17$ ,  $p=0.9175$ ), **(B)** membrane resistance (Rm,  $t=1.589$ ,  $df=17$ ,  $p=0.1305$ ), **(C)** tau ( $t=1.297$ ,  $df=17$ ,  $p=0.2118$ ), **(D)** membrane time constant (Cm,  $t=1.479$ ,  $df=17$ ,  $p=0.1576$ ), a significant difference in **(E)** sag ( $t=2.179$ ,  $df=17$ ,  $p=0.0437$ ), and trend toward difference in **(F)** sag ratio ( $t=1.967$ ,  $df=17$ ,  $p=0.0658$ ) following bath application of ghrelin. Data expressed as mean  $\pm$  SEM.  $n = 10$  cells from 7 female mice, 9 cells from 7 male mice. Source data are provided as a source data file.



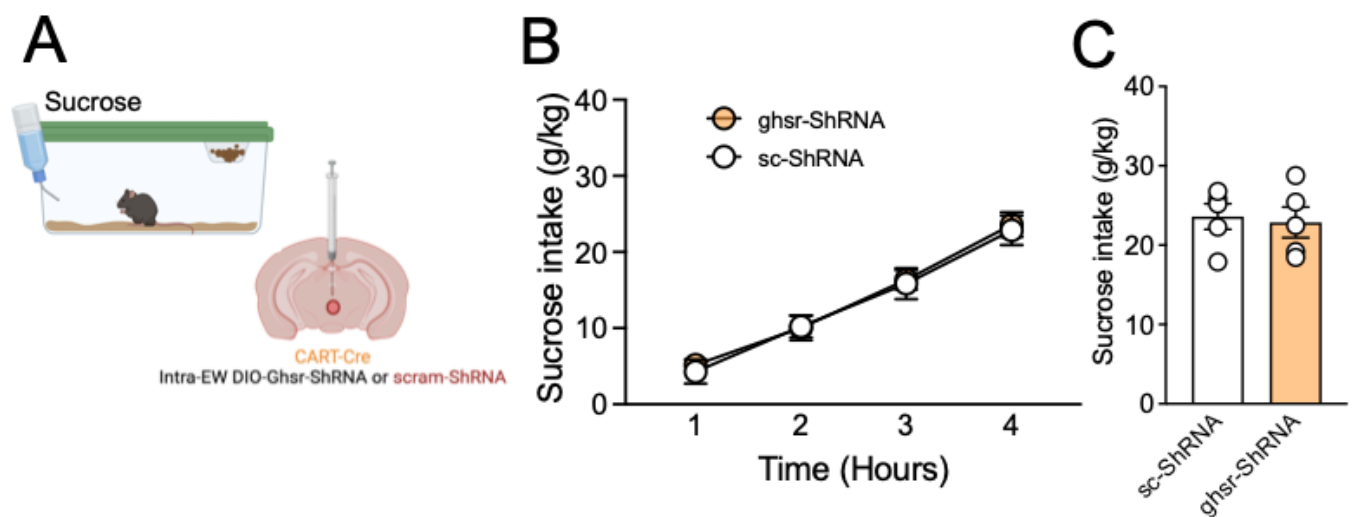

**Supplementary Figure 7, related to Figure 5: GHRS knockdown from EW<sup>CART</sup> cells does not alter sucrose intake.** (A) Schematic of experiment outline of sucrose intake. No difference in (B) cumulative sucrose consumption over time (RM two-way ANOVA, virus F (1, 8) = 0.04907,  $p=0.8302$ ; or interaction F (3, 24) = 0.5929,  $p=0.6257$ ; but main effect of time F (3, 24) = 688.3,  $p<0.0001$ ), or (C) total sucrose consumption (unpaired t-test,  $t=0.2934$ ,  $df=8$ ,  $p=0.7767$ ) was observed in female mice with GHRS injected within the EW. Data expressed as mean  $\pm$  SEM,  $n=5$  mice/treatment. Source data are provided as a source data file. Created in BioRender. Walker, L. (2025) <https://BioRender.com/n20k071> [Agreement # NM27UEXY8C].

## SUPPLEMENTAL TABLES

**Table S1: Key reagents**

| Viruses                                 | Supplier                  |             | Cat #        |
|-----------------------------------------|---------------------------|-------------|--------------|
| AAV2-hsyn-DIO-hM4Di-mcherry             | Addgene                   |             | 44362-AAV2   |
| AAV2-hsyn-DIO-mcherry                   | Addgene                   |             | 50459-AAV2   |
| AAV2-hsyn-Ghsr-ShRNA-mCherry            | Vector Biolabs            |             | This paper   |
| AAV2-hsyn-scramble-ShRNA-mCherry        | Vector Biolabs            |             | This paper   |
| AAV2-hSyn-DIO-Ghsr-ShRNA-mCherry        | Vector Biolabs            |             | This paper   |
| AAV2-hSyn-DIO-scramble-ShRNA-mCherry    | Vector Biolabs            |             | This paper   |
|                                         |                           |             |              |
| Drugs                                   | Supplier                  |             | Cat #        |
| LEAP2 (37-76)                           | Phoenix pharmaceuticals   |             | #075-58      |
| JMV2959                                 | MedChemExpress,           |             | #HY-U00433A  |
| Ghrelin (i.p)                           | BOC Sciences              |             | B0084-103854 |
| Ghrelin (bath)                          | BOC Sciences              |             | B0084-103854 |
|                                         |                           |             |              |
| Antibodies                              | Supplier                  | RRID        | Cat #        |
| Rabbit anti-CART                        | Phoenix                   | AB_2313614  | H-003-62     |
| Goat-anti-CART                          | Pharmaceuticals           | AB_2068569  | #AF163       |
| Goat anti-cFos                          | R&D systems               | AB_2629503  | SC-52-G      |
| Chicken anti-RFP                        | Santa Cruz                | AB_10704808 | 600-901-379  |
| Donkey anti-rabbit AlexaFluor488        | Rockland                  | AB_2535792  | A-21206      |
| Donkey anti-Goat- AlexaFluor594         | Life Technologies         | AB_2534105  | A-11058      |
| Donkey anti-Chicken 594                 | Life Technologies         | AB_2340377  | 703-585-155  |
|                                         |                           |             |              |
| RNAscope                                | Supplier                  |             | Cat #        |
| RNAscope Multiplex Fluorescent Kit (V1) | Advanced Cell Diagnostics |             | 320850       |
| <i>Ghsr</i>                             | Advanced Cell Diagnostics |             | 426148       |
| <i>Cartpt</i>                           | Advanced Cell Diagnostics |             | 432008-C2    |
| <i>Slc17a6 (vGlut2)</i>                 | Advanced Cell Diagnostics |             | 319171-C3    |
| <i>Cre</i>                              | Advanced Cell Diagnostics |             | #312281-C2   |

**Table S2: Primer Sequences**

|              | Forward                 | Reverse                  |
|--------------|-------------------------|--------------------------|
| <b>Actin</b> | GAACCCTAAGGCCAACCGTG    | GGTACGACCAGAGGCATACA     |
| <b>Hprt</b>  | GCAGTACAGCCCCAAAATGG    | GGTCCTTTTCACCAGCAAGCT    |
| <b>Ghsr</b>  | CTCAGGGACCAGAACCACAAAC  | ACAAAGGACACCAGGTTGCAG    |
| <b>Esr1</b>  | CCTTGTCTCTTCCCTGATGTCAA | GTTCAATTGTGACTGCCCTTGATC |
| <b>Esr2</b>  | CGGTCTGTCTGAATGTGGTCA   | GAAGCTGTGTGTGTGTGTGTC    |
| <b>Parq5</b> | GTTACCGACACCCACAGAGTT   | CGTCCAGATGTTGAGGGTCTC    |
| <b>Parq8</b> | GACGACTGCCATCCTAGAGC    | CTGCTGCCCACTCATTGACA     |

**Table S3: Statistical analysis**

| Stats for Fig .1 |                          | Main effect        |          |                     |          |                     |          |
|------------------|--------------------------|--------------------|----------|---------------------|----------|---------------------|----------|
| Analysis         |                          | Sex                |          | Treatment           |          | Interaction         |          |
| <b>b</b>         | 2-tailed unpaired t-test |                    |          | t=2.607, df=13      | P=0.0217 |                     |          |
| <b>d</b>         | Two-way ANOVA            | F (1, 28) = 6.567  | P=0.0161 | F (1, 28) = 26.86   | P<0.0001 | F (1, 28) = 1.477   | P=0.2344 |
| <b>e</b>         | linear regression        |                    |          | R= 0.3877           | P=0.0132 |                     |          |
| <b>f</b>         | Two-way ANOVA            | F (1, 27) = 1.162  | P=0.2907 | F (1, 27) = 7.420   | P=0.0112 | F (1, 27) = 0.6193  | P=0.4382 |
| <b>g</b>         | Two-way ANOVA            | F (1, 26) = 0.7528 | P=0.3935 | F (1, 26) = 3.104   | P=0.0899 | F (1, 26) = 0.03023 | P=0.8633 |
|                  |                          | Time               |          | Treatment           |          | Interaction         |          |
| <b>k</b>         | RM Two-way ANOVA         | F (3, 21) = 450.9  | P<0.0001 | F (1, 7) = 2.116    | P=0.1891 | F (3, 21) = 0.5561  | P=0.6498 |
| <b>l</b>         | 2-tailed Paired t-test   |                    |          | t=0.9523, df=7      | P=0.3727 |                     |          |
| <b>m</b>         | RM Two-way ANOVA         | F (3, 24) = 188.1  | P<0.0001 | F (1, 8) = 20.38    | P=0.0020 | F (3, 24) = 3.171   | P=0.0426 |
| <b>n</b>         | 2-tailed Paired t-test   |                    |          | t=3.378, df=8       | P=0.0097 |                     |          |
| <b>o</b>         | RM Two-way ANOVA         | F (3, 18) = 150.8  | P<0.0001 | F (1, 6) = 0.5880   | P=0.4723 | F (3, 18) = 0.9155  | P=0.4532 |
| <b>p</b>         | 2-tailed Paired t-test   |                    |          | t=0.1980, df=6      | P=0.8496 |                     |          |
| <b>q</b>         | RM Two-way ANOVA         | F (3, 21) = 95.49  | P<0.0001 | F (1, 7) = 0.003947 | P=0.9517 | F (3, 21) = 0.5557  | P=0.6500 |
| <b>r</b>         | 2-tailed Paired t-test   |                    |          | t=0.3474, df=7      | P=0.7385 |                     |          |

| Stats for Fig .2 |                              | Main effect              |          |                            |          |                          |          |
|------------------|------------------------------|--------------------------|----------|----------------------------|----------|--------------------------|----------|
| Analysis         |                              | Time                     |          | Treatment                  |          | Interaction              |          |
| <b>d</b>         | RM Two-way ANOVA             | F (2, 42) = 94.15        | P<0.0001 | F (2, 21) = 5.364          | P=0.0131 | F (4, 42) = 1.457        | P=0.2324 |
| <b>e</b>         | RM One-way ANOVA             |                          |          | F (2, 21) = 3.512          | P=0.0483 |                          |          |
| <b>f</b>         | RM Two-way ANOVA             | F (1.385, 9.693) = 51.95 | P<0.0001 | F (1.825, 12.77) = 0.02530 | P=0.9674 | F (2.41, 16.93) = 0.1348 | P=0.9076 |
| <b>g</b>         | RM One-way ANOVA             |                          |          | F (2, 21) = 0.03941        | P=0.9614 |                          |          |
| <b>j</b>         | EW 2-tailed unpaired t-test  |                          |          | t=5.729, df=23             | P<0.0001 |                          |          |
|                  | VTA 2-tailed unpaired t-test |                          |          | t=0.8112, df=23            | P=0.4256 |                          |          |
| <b>k</b>         | RM Two-way ANOVA             | F (8, 88) = 2.301        | P=0.0274 | F (1, 11) = 1.853          | P=0.2007 | F (8, 88) = 2.500        | P=0.0170 |
| <b>l</b>         | RM Two-way ANOVA             | F (1.993, 21.92) = 189.7 | P<0.0001 | F (1, 11) = 5.328          | P=0.0414 | F (3, 33) = 1.558        | P=0.2181 |
| <b>m</b>         | 2-tailed unpaired t-test     |                          |          | t=2.527, df=11             | P=0.0281 |                          |          |
| <b>n</b>         | linear regression            |                          |          | R2 = 0.4332                | P=0.0145 |                          |          |
| <b>o</b>         | RM Two-way ANOVA             | F (4.686, 46.86) = 2.884 | P=0.0261 | F (1, 10) = 2.639          | P=0.1353 | F (8, 80) = 1.006        | P=0.4380 |
| <b>p</b>         | RM Two-way ANOVA             | F (1.367, 13.67) = 56.69 | P<0.0001 | F (1, 10) = 0.2224         | P=0.6473 | F (3, 30) = 0.3392       | P=0.7971 |
| <b>q</b>         | 2-tailed unpaired t-test     |                          |          | t=0.2184, df=10            | P=0.8315 |                          |          |
| <b>r</b>         | linear regression            |                          |          | R2 = 0.0001                | P=0.9532 |                          |          |

| Stats for Fig .3 |                          | Main effect        |          |                      |          |                     |          |
|------------------|--------------------------|--------------------|----------|----------------------|----------|---------------------|----------|
| Analysis         |                          | Time               |          | Treatment            |          | Interaction         |          |
| <b>c</b>         | One way-ANOVA            |                    |          | F (2, 23) = 7.176    | P=0.0038 |                     |          |
| <b>d</b>         | RM Two-way ANOVA         | F (6, 102) = 7.570 | P<0.0001 | F (1, 17) = 0.8116   | P=0.3802 | F (6, 102) = 0.4490 | P=0.8442 |
| <b>e</b>         | RM Two-way ANOVA         | F (3, 51) = 171.1  | P<0.0001 | F (1, 17) = 0.003585 | P=0.9530 | F (3, 51) = 0.7051  | P=0.5534 |
| <b>f</b>         | 2-tailed unpaired t-test |                    |          | t=0.6164, df=17      | P=0.5458 |                     |          |
| <b>g</b>         | 2-tailed unpaired t-test |                    |          | t=3.871, df=17       | P=0.0012 |                     |          |

| Stats for Fig .4 |        |                          | stats          |  | p value  |
|------------------|--------|--------------------------|----------------|--|----------|
| Analysis         |        |                          |                |  |          |
| <b>d</b>         | Ghsr   | 2-tailed unpaired t-test | t=1.950, df=7  |  | P=0.0922 |
|                  | Cartpt | 2-tailed unpaired t-test | t=0.7822, df=7 |  | P=0.4598 |
|                  | vGlut2 | 2-tailed unpaired t-test | t=1.207, df=7  |  | P=0.2668 |
| <b>g</b>         |        | 2-tailed unpaired t-test | t=2.232, df=9  |  | P=0.0525 |
| <b>h</b>         |        | 2-tailed unpaired t-test | t=3.850, df=9  |  | P=0.0039 |
| <b>i</b>         |        | 2-tailed unpaired t-test | t=2.628, df=9  |  | P=0.0274 |
| <b>j</b>         |        | 2-tailed unpaired t-test | t=1.296, df=9  |  | P=0.2273 |
| <b>k</b>         |        | 2-tailed unpaired t-test | t=0.1361, df=9 |  | P=0.8947 |
| <b>m</b>         |        | 2-tailed paired t-test   | t=6.452, df=9  |  | P<0.0001 |
| <b>m</b>         |        | 2-tailed paired t-test   | t=5.614, df=8  |  | P=0.0005 |
| <b>n</b>         |        | 2-tailed unpaired t-test | t=2.178, df=17 |  | P=0.0438 |
| <b>n</b>         |        | 2-tailed paired t-test   | t=8.425, df=9  |  | P<0.0001 |
| <b>o</b>         |        | 2-tailed paired t-test   | t=8.512, df=8  |  | P<0.0001 |

|   |  |                          |                 |          |
|---|--|--------------------------|-----------------|----------|
| p |  | 2-tailed unpaired t-test | t=0.9445, df=17 | P=0.3581 |
|---|--|--------------------------|-----------------|----------|

| Stats for Fig .5 |                          |                          | Main effect |  |                      |          |                    |          |
|------------------|--------------------------|--------------------------|-------------|--|----------------------|----------|--------------------|----------|
|                  | Analysis                 |                          | Time        |  | Treatment            |          | Interaction        |          |
| d                | RM Two-way ANOVA         | F (2.993, 47.88) = 4.752 | P=0.0056    |  | F (1, 16) = 9.113    | P=0.0082 | F (5, 80) = 0.9294 | P=0.4665 |
| e                | RM Two-way ANOVA         | F (1.664, 26.63) = 225.6 | P<0.0001    |  | F (1, 16) = 10.99    | P=0.0044 | F (3, 48) = 4.471  | P=0.0076 |
| f                | 2-tailed unpaired t-test |                          |             |  | t=3.833, df=16       | P=0.0015 |                    |          |
| j                | RM Two-way ANOVA         | F (3.164, 53.78) = 1.317 | P=0.2783    |  | F (1, 17) = 0.002752 | P=0.9588 | F (5, 85) = 0.1803 | P=0.9693 |
| k                | RM Two-way ANOVA         | F (1.643, 27.92) = 188.0 | P<0.0001    |  | F (1, 17) = 0.8315   | P=0.3746 | F (3, 51) = 1.597  | P=0.2015 |
| l                | 2-tailed unpaired t-test |                          |             |  | t=1.247, df=17       | P=0.2293 |                    |          |

| Stats for Fig .6 |                                 |                          | Main effect |  |                           |          |                          |          |
|------------------|---------------------------------|--------------------------|-------------|--|---------------------------|----------|--------------------------|----------|
|                  | Analysis                        |                          | Time        |  | Treatment                 |          | Interaction              |          |
| d                | RM Mixed effects model          | F (11, 109) = 1.481      | P=0.1489    |  | F (1, 10) = 0.1116        | P=0.7453 | F (11, 109) = 0.1950     | P=0.9976 |
| e                | intra-EW 2-tailed Paired t-test |                          |             |  | t=0.5968, df=6            | P=0.5725 |                          |          |
|                  | control 2-tailed Paired t-test  |                          |             |  | t=0.8929, df=4            | P=0.4224 |                          |          |
| f                | RM Two-way ANOVA                | F (1.471, 8.825) = 42.41 | P<0.0001    |  | F (1.431, 8.583) = 11.37  | P=0.0058 | F (2.760, 16.56) = 5.695 | P=0.0082 |
| g                | RM One-way ANOVA                |                          |             |  | F (1.625, 9.749) = 11.60  | P=0.0036 |                          |          |
| h                | RM Two-way ANOVA                | F (1.270, 5.082) = 43.57 | P=0.0009    |  | F (1.748, 6.991) = 0.7170 | P=0.5029 | F (1.969, 7.876) = 1.674 | P=0.2476 |
| i                | RM One-way ANOVA                |                          |             |  | F (1.127, 4.510) = 1.004  | P=0.3797 |                          |          |
